# Supplementary figures and images for: Serum biomolecules unable to compete with drug refilling into cyclodextrin polymers regardless of the form
Source: Royal Society of Chemistry journal article supplement (doi:10.1039/c9tb00622b), 2019-01-01

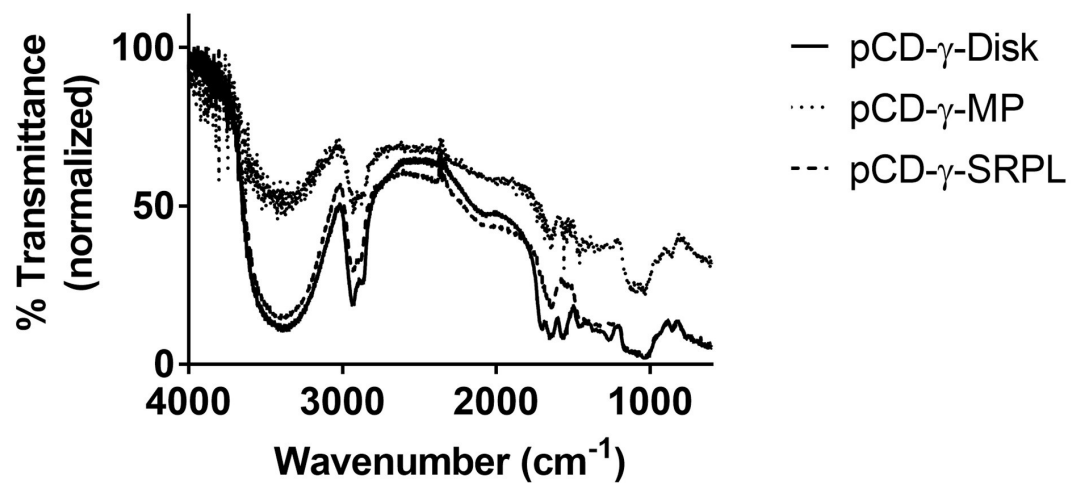

Supplement: c9tb00622b2.pdf [file c9tb00622b2.pdf]

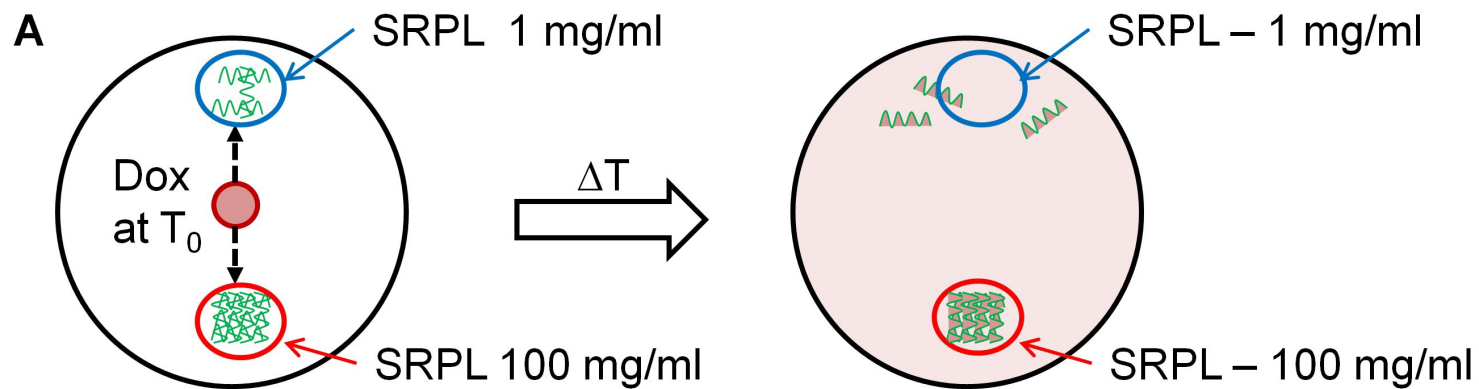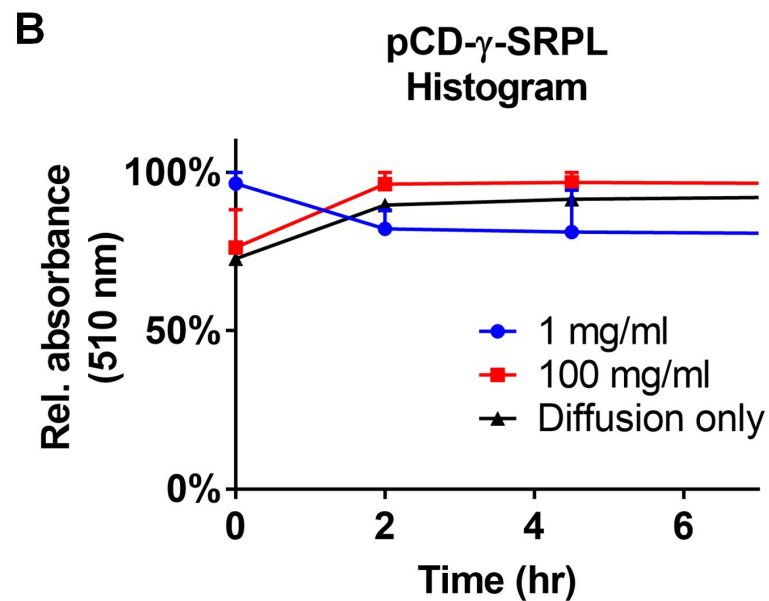

Supplement: c9tb00622b3.pdf [file c9tb00622b3.pdf]
